# Supplementary material for: Clinical relevance of accuracy in in-house 3D printing in craniomaxillofacial surgery: A comparative study of FFF, SLA, and MJ Technologies
Source: Research Square preprint supplement (doi:10.21203/rs.3.rs-7633361/v1), 2025-10-17
Supplement: Supplementary file 1 [file d915574289a9d976ffacab2a.xlsx]

## Sheet: Blad1
ComparisonID	Printer	AnatomicalModel	Comparisontype	Buildcomparison	TimeA	TimeB	IntraInter	ClusterID	RMS	LogROMS
IntraAvsIntraB	Forms3	sfenoid	intra-build	T1-T1	T1	T1	Intra	forms_sfenoid_T1	0.0724	-2.62555
IntraBvsIntraC	Forms3	sfenoid	intra-build	T1-T1	T1	T1	Intra	forms_sfenoid_T1	0.0899	-2.40906
IntraAvsIntraC	Forms3	sfenoid	intra-build	T1-T1	T1	T1	Intra	forms_sfenoid_T1	0.0826	-2.49375
IntraA vs IntraB	Forms3	frontale	intra-build	T1-T1	T1	T1	Intra	forms_frontale_T1	0.4953	-0.702592
Intra A vs Intra B	Forms3	zygoma	intra-build	T1-T1	T1	T1	Intra	forms_zygoma_T1	0.042	-3.17009
Intra B vs Intra C	Forms3	zygoma	intra-build	T1-T1	T1	T1	Intra	forms_zygoma_T1	0.0291	-3.53702
Intra A vs Intra C	Forms3	zygoma	intra-build	T1-T1	T1	T1	Intra	forms_zygoma_T1	0.0278	-3.58272
Intra A vs Intra B	Forms3	mandibula	intra-build	T1-T1	T1	T1	Intra	forms_mandibula_T1	0.0662	-2.71507
Intra A vs Intra B	Felix	sfenoid	intra-build	T1-T1	T1	T1	Intra	felix_sfenoid_T1	0.28	-1.27297
Intra B vs Intra C	Felix	sfenoid	intra-build	T1-T1	T1	T1	Intra	felix_sfenoid_T1	0.1134	-2.17683
Intra A vs Intra C	Felix	sfenoid	intra-build	T1-T1	T1	T1	Intra	felix_sfenoid_T1	0.1058	-2.2462
Intra A vs Intra B	Felix	frontale	intra-build	T1-T1	T1	T1	Intra	felix_frontale_T1	0.1174	-2.14217
Intra B vs Intra C	Felix	frontale	intra-build	T1-T1	T1	T1	Intra	felix_frontale_T1	0.2308	-1.4662
Intra A vs Intra C	Felix	frontale	intra-build	T1-T1	T1	T1	Intra	felix_frontale_T1	0.2219	-1.50553
Intra A vs Intra B	Felix	zygoma	intra-build	T1-T1	T1	T1	Intra	felix_zygoma_T1	0.0451	-3.09887
Intra B vs Intra C	Felix	zygoma	intra-build	T1-T1	T1	T1	Intra	felix_zygoma_T1	0.0404	-3.20893
Intra A vs Intra C	Felix	zygoma	intra-build	T1-T1	T1	T1	Intra	felix_zygoma_T1	0.0459	-3.08129
Intra A vs Intra B	Felix	mandibula	intra-build	T1-T1	T1	T1	Intra	felix_mandibula_T1	0.1601	-1.83196
Intra A vs Intra B	Stratasys	sfenoid	intra-build	T1-T1	T1	T1	Intra	stratasys_sfenoid_T1	0.0537	-2.92434
Intra A vs Intra C	Stratasys	sfenoid	intra-build	T1-T1	T1	T1	Intra	stratasys_sfenoid_T1	0.0511	-2.97397
Intra A vs Intra D	Stratasys	sfenoid	intra-build	T1-T1	T1	T1	Intra	stratasys_sfenoid_T1	0.0527	-2.94314
Intra B vs Intra C	Stratasys	sfenoid	intra-build	T1-T1	T1	T1	Intra	stratasys_sfenoid_T1	0.0567	-2.86998
Intra B vs Intra D	Stratasys	sfenoid	intra-build	T1-T1	T1	T1	Intra	stratasys_sfenoid_T1	0.0666	-2.70905
Intra C vs Intra D	Stratasys	sfenoid	intra-build	T1-T1	T1	T1	Intra	stratasys_sfenoid_T1	0.0424	-3.16061
Intra A vs Intra B	Stratasys	frontale	intra-build	T1-T1	T1	T1	Intra	stratasys_frontale_T1	0.1011	-2.29165
Intra A vs Intra C	Stratasys	frontale	intra-build	T1-T1	T1	T1	Intra	stratasys_frontale_T1	0.0796	-2.53074
Intra A vs Intra D	Stratasys	frontale	intra-build	T1-T1	T1	T1	Intra	stratasys_frontale_T1	0.0919	-2.38705
Intra B vs Intra C	Stratasys	frontale	intra-build	T1-T1	T1	T1	Intra	stratasys_frontale_T1	0.0694	-2.66787
Intra B vs Intra D	Stratasys	frontale	intra-build	T1-T1	T1	T1	Intra	stratasys_frontale_T1	0.0835	-2.48291
Intra C vs Intra D	Stratasys	frontale	intra-build	T1-T1	T1	T1	Intra	stratasys_frontale_T1	0.0555	-2.89137
Intra A vs Intra B	Stratasys	zygoma	intra-build	T1-T1	T1	T1	Intra	stratasys_zygoma_T1	0.0642	-2.74575
Intra A vs Intra C	Stratasys	zygoma	intra-build	T1-T1	T1	T1	Intra	stratasys_zygoma_T1	0.0471	-3.05548
Intra A vs Intra D	Stratasys	zygoma	intra-build	T1-T1	T1	T1	Intra	stratasys_zygoma_T1	0.0424	-3.16061
Intra B vs Intra C	Stratasys	zygoma	intra-build	T1-T1	T1	T1	Intra	stratasys_zygoma_T1	0.0755	-2.58362
Intra B vs Intra D	Stratasys	zygoma	intra-build	T1-T1	T1	T1	Intra	stratasys_zygoma_T1	0.0623	-2.77579
Intra C vs Intra D	Stratasys	zygoma	intra-build	T1-T1	T1	T1	Intra	stratasys_zygoma_T1	0.034	-3.38139
Intra A vs Intra B	Stratasys	mandibula	intra-build	T1-T1	T1	T1	Intra	stratasys_mandibula_T1	0.0953	-2.35073
Intra A vs Intra C	Stratasys	mandibula	intra-build	T1-T1	T1	T1	Intra	stratasys_mandibula_T1	0.0751	-2.58893
Intra A vs Intra D	Stratasys	mandibula	intra-build	T1-T1	T1	T1	Intra	stratasys_mandibula_T1	0.0498	-2.99974
Intra B vs Intra C	Stratasys	mandibula	intra-build	T1-T1	T1	T1	Intra	stratasys_mandibula_T1	0.0907	-2.4002
Intra B vs Intra D	Stratasys	mandibula	intra-build	T1-T1	T1	T1	Intra	stratasys_mandibula_T1	0.0834	-2.48411
Intra C vs Intra D	Stratasys	mandibula	intra-build	T1-T1	T1	T1	Intra	stratasys_mandibula_T1	0.051	-2.97593
Between A vs Between B	Forms3	sfenoid	inter-build	T2-T3	T2	T3	inter	forms_sfenoid_T2T3	0.0517	-2.9623
Between B vs Between C	Forms3	sfenoid	inter-build	T3-T4	T3	T4	inter	forms_sfenoid_T3T4	0.0912	-2.3947
Between A vs Between C	Forms3	sfenoid	inter-build	T2-T4	T2	T4	inter	forms_sfenoid_T2T4	0.0806	-2.51826
Between A vs Between B	Forms3	frontale	inter-build	T2-T3	T2	T3	inter	forms_frontale_T2T3	0.1954	-1.63271
Between B vs Between C	Forms3	frontale	inter-build	T3-T4	T3	T4	inter	forms_frontale_T3T4	0.1541	-1.87015
Between A vs Between C	Forms3	frontale	inter-build	T2-T4	T2	T4	inter	forms_frontale_T2T4	0.3091	-1.17409
Between A vs Between B	Forms3	zygoma	inter-build	T2-T3	T2	T3	inter	forms_zygoma_T2T3	0.0565	-2.87351
Between B vs Between C	Forms3	zygoma	inter-build	T3-T4	T3	T4	inter	forms_zygoma_T3T4	0.0743	-2.59964
Between A vs Between C	Forms3	zygoma	inter-build	T2-T4	T2	T4	inter	forms_zygoma_T2T4	0.0548	-2.90407
Between A vs Between B	Forms3	mandibula	inter-build	T2-T3	T2	T3	inter	forms_mandibula_T2T3	0.2861	-1.25141
Between B vs Between C	Forms3	mandibula	inter-build	T3-T4	T3	T4	inter	forms_mandibula_T3T4	0.1805	-1.71202
Between A vs Between C	Forms3	mandibula	inter-build	T2-T4	T2	T4	inter	forms_mandibula_T2T4	0.0906	-2.4013
Between A vs Between B	Felix	sfenoid	inter-build	T2-T3	T2	T3	inter	felix_sfenoid_T2T3	0.4689	-0.757366
Between B vs Between C	Felix	sfenoid	inter-build	T3-T4	T3	T4	inter	felix_sfenoid_T3T4	0.1915	-1.65287
Between A vs Between C	Felix	sfenoid	inter-build	T2-T4	T2	T4	inter	felix_sfenoid_T2T4	0.2106	-1.55779
Between A vs Between B	Felix	frontale	inter-build	T2-T3	T2	T3	inter	felix_frontale_T2T3	0.2133	-1.54506
Between B vs Between C	Felix	frontale	inter-build	T3-T4	T3	T4	inter	felix_frontale_T3T4	0.1491	-1.90314
Between A vs Between C	Felix	frontale	inter-build	T2-T4	T2	T4	inter	felix_frontale_T2T4	0.2268	-1.48369
Between A vs Between B	Felix	zygoma	inter-build	T2-T3	T2	T3	inter	felix_zygoma_T2T3	0.0413	-3.18689
Between B vs Between C	Felix	zygoma	inter-build	T3-T4	T3	T4	inter	felix_zygoma_T3T4	0.0634	-2.75829
Between A vs Between C	Felix	zygoma	inter-build	T2-T4	T2	T4	inter	felix_zygoma_T2T4	0.0534	-2.92994
Between A vs Between B	Felix	mandibula	inter-build	T2-T3	T2	T3	inter	felix_mandibula_T2T3	0.2588	-1.3517
Between B vs Between C	Felix	mandibula	inter-build	T3-T4	T3	T4	inter	felix_mandibula_T3T4	0.2041	-1.58915
Between A vs Between C	Felix	mandibula	inter-build	T2-T4	T2	T4	inter	felix_mandibula_T2T4	0.1596	-1.83508
Between A vs Between B	Stratasys	sfenoid	inter-build	T2-T3	T2	T3	inter	stratasys_sfenoid_T2T3	0.0593	-2.82515
Between B vs Between C	Stratasys	sfenoid	inter-build	T3-T4	T3	T4	inter	stratasys_sfenoid_T3T4	0.0681	-2.68678
Between A vs Between C	Stratasys	sfenoid	inter-build	T2-T4	T2	T4	inter	stratasys_sfenoid_T2T4	0.0593	-2.82515
Between A vs Between B	Stratasys	frontale	inter-build	T2-T3	T2	T3	inter	stratasys_frontale_T2T3	0.0042	-5.47267
Between B vs Between C	Stratasys	frontale	inter-build	T3-T4	T3	T4	inter	stratasys_frontale_T3T4	0.1706	-1.76843
Between A vs Between C	Stratasys	frontale	inter-build	T2-T4	T2	T4	inter	stratasys_frontale_T2T4	0.0622	-2.7774
Between A vs Between B	Stratasys	zygoma	inter-build	T2-T3	T2	T3	inter	stratasys_zygoma_T2T3	0.0377	-3.2781
Between B vs Between C	Stratasys	zygoma	inter-build	T3-T4	T3	T4	inter	stratasys_zygoma_T3T4	0.0569	-2.86646
Between A vs Between C	Stratasys	zygoma	inter-build	T2-T4	T2	T4	inter	stratasys_zygoma_T2T4	0.0641	-2.74731
Between A vs Between B	Stratasys	mandibula	inter-build	T2-T3	T2	T3	inter	stratasys_mandibula_T2T3	0.0722	-2.62832
Between B vs Between C	Stratasys	mandibula	inter-build	T3-T4	T3	T4	inter	stratasys_mandibula_T3T4	0.0691	-2.6722
Between A vs Between C	Stratasys	mandibula	inter-build	T2-T4	T2	T4	inter	stratasys_mandibula_T2T4	0.105	-2.25379
Between A vs origineel	Forms3	sfenoid	trueness	T2-T0	T2	T0	inter	forms_sfenoid_T2T0	0.1118	-2.19104
Between B vs origineel	Forms3	sfenoid	trueness	T3-T0	T3	T0	inter	forms_sfenoid_T3T0	0.1215	-2.10784
Between C vs origineel	Forms3	sfenoid	trueness	T4-T0	T4	T0	inter	forms_sfenoid_T4T0	0.1063	-2.24149
Intra A vs origineel	Forms3	sfenoid	trueness	T1-T0	T1	T0	intra	forms_sfenoid_T1T0	0.1081	-2.2247
Intra B vs origineel	Forms3	sfenoid	trueness	T1-T0	T1	T0	intra	forms_sfenoid_T1T0	0.1079	-2.22655
Intra C vs origineel	Forms3	sfenoid	trueness	T1-T0	T1	T0	intra	forms_sfenoid_T1T0	0.1338	-2.01141
Between A vs origineel	Forms3	frontale	trueness	T2-T0	T2	T0	inter	forms_frontale_T2T0	0.2826	-1.26372
Between B vs origineel	Forms3	frontale	trueness	T3-T0	T3	T0	inter	forms_frontale_T3T0	0.1586	-1.84137
Between C vs origineel	Forms3	frontale	trueness	T4-T0	T4	T0	inter	forms_frontale_T4T0	0.1523	-1.8819
Intra A vs origineel	Forms3	frontale	trueness	T1-T0	T1	T0	intra	forms_frontale_T1T0	0.1923	-1.6487
Intra B vs origineel	Forms3	frontale	trueness	T1-T0	T1	T0	intra	forms_frontale_T1T0	0.1856	-1.68416
Between A vs origineel	Forms3	zygoma	trueness	T2-T0	T2	T0	inter	forms_zygoma_T2T0	0.0748	-2.59294
Between B vs origineel	Forms3	zygoma	trueness	T3-T0	T3	T0	inter	forms_zygoma_T3T0	0.0739	-2.60504
Between C vs origineel	Forms3	zygoma	trueness	T4-T0	T4	T0	inter	forms_zygoma_T4T0	0.0705	-2.65214
Intra A vs origineel	Forms3	zygoma	trueness	T1-T0	T1	T0	intra	forms_zygoma_T1T0	0.0762	-2.57439
Intra B vs origineel	Forms3	zygoma	trueness	T1-T0	T1	T0	intra	forms_zygoma_T1T0	0.0797	-2.52949
Intra C vs origineel	Forms3	zygoma	trueness	T1-T0	T1	T0	intra	forms_zygoma_T1T0	0.0765	-2.57046
Between A vs origineel	Forms3	mandibula	trueness	T2-T0	T2	T0	inter	forms_mandibula_T2T0	0.0945	-2.35916
Between B vs origineel	Forms3	mandibula	trueness	T3-T0	T3	T0	inter	forms_mandibula_T3T0	0.1133	-2.17772
Between C vs origineel	Forms3	mandibula	trueness	T4-T0	T4	T0	inter	forms_mandibula_T4T0	0.0883	-2.42702
Intra A vs origineel	Forms3	mandibula	trueness	T1-T0	T1	T0	intra	forms_mandibula_T1T0	0.2915	-1.23272
Intra B vs origineel	Forms3	mandibula	trueness	T1-T0	T1	T0	inter	forms_mandibula_T1T0	0.216	-1.53248
Between A vs origineel	Felix	sfenoid	trueness	T2-T0	T2	T0	inter	felix_sfenoid_T2T0	0.1314	-2.02951
Between B vs origineel	Felix	sfenoid	trueness	T3-T0	T3	T0	inter	felix_sfenoid_T3T0	0.1403	-1.96397
Between C vs origineel	Felix	sfenoid	trueness	T4-T0	T4	T0	inter	felix_sfenoid_T4T0	0.1273	-2.06121
Intra A vs origineel	Felix	sfenoid	trueness	T1-T0	T1	T0	intra	felix_sfenoid_T1T0	0.1195	-2.12444
Intra B vs origineel	Felix	sfenoid	trueness	T1-T0	T1	T0	intra	felix_sfenoid_T1T0	0.136	-1.9951
Intra C vs origineel	Felix	sfenoid	trueness	T1-T0	T1	T0	intra	felix_sfenoid_T1T0	0.1117	-2.19194
Between A vs origineel	Felix	frontale	trueness	T2-T0	T2	T0	inter	felix_frontale_T2T0	0.192	-1.65026
Between B vs origineel	Felix	frontale	trueness	T3-T0	T3	T0	inter	felix_frontale_T3T0	0.1575	-1.84833
Between C vs origineel	Felix	frontale	trueness	T4-T0	T4	T0	inter	felix_frontale_T4T0	0.1568	-1.85278
Intra A vs origineel	Felix	frontale	trueness	T1-T0	T1	T0	intra	felix_frontale_T1T0	0.174	-1.7487
Intra B vs origineel	Felix	frontale	trueness	T1-T0	T1	T0	intra	felix_frontale_T1T0	0.1725	-1.75736
Intra C vs origineel	Felix	frontale	trueness	T1-T0	T1	T0	intra	felix_frontale_T1T0	0.1717	-1.76201
Between A vs origineel	Felix	zygoma	trueness	T2-T0	T2	T0	inter	felix_zygoma_T2T0	0.0956	-2.34758
Between B vs origineel	Felix	zygoma	trueness	T3-T0	T3	T0	inter	felix_zygoma_T3T0	0.0961	-2.34237
Between C vs origineel	Felix	zygoma	trueness	T4-T0	T4	T0	inter	felix_zygoma_T4T0	0.0889	-2.42024
Intra A vs origineel	Felix	zygoma	trueness	T1-T0	T1	T0	intra	felix_zygoma_T1T0	0.0843	-2.47337
Intra B vs origineel	Felix	zygoma	trueness	T1-T0	T1	T0	intra	felix_zygoma_T1T0	0.0838	-2.47932
Intra C vs origineel	Felix	zygoma	trueness	T1-T0	T1	T0	intra	felix_zygoma_T1T0	0.08	-2.52573
Between A vs origineel	Felix	mandibula	trueness	T2-T0	T2	T0	inter	felix_mandibula_T2T0	0.1391	-1.97256
Between B vs origineel	Felix	mandibula	trueness	T3-T0	T3	T0	inter	felix_mandibula_T3T0	0.1431	-1.94421
Between C vs origineel	Felix	mandibula	trueness	T4-T0	T4	T0	inter	felix_mandibula_T4T0	0.1176	-2.14047
Intra A vs origineel	Felix	mandibula	trueness	T1-T0	T1	T0	intra	felix_mandibula_T1T0	0.1473	-1.91528
Intra B vs origineel	Felix	mandibula	trueness	T1-T0	T1	T0	intra	felix_mandibula_T1T0	0.1449	-1.93171
Between A vs origineel	Stratasys	sfenoid	trueness	T2-T0	T2	T0	inter	stratasys_sfenoid_T2T0	0.0779	-2.55233
Between B vs origineel	Stratasys	sfenoid	trueness	T3-T0	T3	T0	inter	stratasys_sfenoid_T3T0	0.0793	-2.53452
Between C vs origineel	Stratasys	sfenoid	trueness	T4-T0	T4	T0	inter	stratasys_sfenoid_T4T0	0.0882	-2.42815
Intra A vs origineel	Stratasys	sfenoid	trueness	T1-T0	T1	T0	intra	stratasys_sfenoid_T1T0	0.094	-2.36446
Intra B vs origineel	Stratasys	sfenoid	trueness	T1-T0	T1	T0	intra	stratasys_sfenoid_T1T0	0.0868	-2.44415
Intra C vs origineel	Stratasys	sfenoid	trueness	T1-T0	T1	T0	intra	stratasys_sfenoid_T1T0	0.0835	-2.48291
Intra D vs origineel	Stratasys	sfenoid	trueness	T1-T0	T1	T0	intra	stratasys_sfenoid_T1T0	0.0843	-2.47337
Between A vs origineel	Stratasys	frontale	trueness	T2-T0	T2	T0	inter	stratasys_frontale_T2T0	0.0794	-2.53326
Between B vs origineel	Stratasys	frontale	trueness	T3-T0	T3	T0	inter	stratasys_frontale_T3T0	0.0789	-2.53957
Between C vs origineel	Stratasys	frontale	trueness	T4-T0	T4	T0	inter	stratasys_frontale_T4T0	0.0839	-2.47813
Intra A vs origineel	Stratasys	frontale	trueness	T1-T0	T1	T0	intra	stratasys_frontale_T1T0	0.104	-2.26336
Intra B vs origineel	Stratasys	frontale	trueness	T1-T0	T1	T0	intra	stratasys_frontale_T1T0	0.0986	-2.31668
Intra C vs origineel	Stratasys	frontale	trueness	T1-T0	T1	T0	intra	stratasys_frontale_T1T0	0.1021	-2.2818
Intra D vs origineel	Stratasys	frontale	trueness	T2-T0	T1	T0	intra	stratasys_frontale_T1T0	0.111	-2.19823
Between A vs origineel	Stratasys	zygoma	trueness	T3-T0	T2	T0	inter	stratasys_zygoma_T2T0	0.0633	-2.75987
Between B vs origineel	Stratasys	zygoma	trueness	T4-T0	T3	T0	inter	stratasys_zygoma_T3T0	0.0789	-2.53957
Between C vs origineel	Stratasys	zygoma	trueness	T1-T0	T4	T0	inter	stratasys_zygoma_T4T0	0.0839	-2.47813
Intra A vs origineel	Stratasys	zygoma	trueness	T1-T0	T1	T0	intra	stratasys_zygoma_T1T0	0.077	-2.56395
Intra B vs origineel	Stratasys	zygoma	trueness	T1-T0	T1	T0	intra	stratasys_zygoma_T1T0	0.0508	-2.97986
Intra C vs origineel	Stratasys	zygoma	trueness	T1-T0	T1	T0	intra	stratasys_zygoma_T1T0	0.0629	-2.76621
Intra D vs origineel	Stratasys	zygoma	trueness	T1-T0	T1	T0	intra	stratasys_zygoma_T1T0	0.0632	-2.76145
Between A vs origineel	Stratasys	mandibula	trueness	T2-T0	T2	T0	inter	stratasys_mandibula_T2T0	0.0953	-2.35073
Between B vs origineel	Stratasys	mandibula	trueness	T3-T0	T3	T0	inter	stratasys_mandibula_T3T0	0.1033	-2.27012
Between C vs origineel	Stratasys	mandibula	trueness	T4-T0	T4	T0	inter	stratasys_mandibula_T4T0	0.1293	-2.04562
Intra A vs origineel	Stratasys	mandibula	trueness	T1-T0	T1	T0	intra	stratasys_mandibula_T1T0	0.1098	-2.20909
Intra B vs origineel	Stratasys	mandibula	trueness	T1-T0	T1	T0	intra	stratasys_mandibula_T1T0	0.1008	-2.29462
Intra C vs origineel	Stratasys	mandibula	trueness	T1-T0	T1	T0	intra	stratasys_mandibula_T1T0	0.1024	-2.27887
Intra D vs origineel	Stratasys	mandibula	trueness	T1-T0	T1	T0	intra	stratasys_mandibula_T1T0	0.1009	-2.29363
